# Supplementary material
Source: PubMed Central journal article supplement (PMC2754385)
Supplement: NIHMS112910-supplement-1.pdf [file NIHMS112910-supplement-1.pdf]

Supplementary Information for “Localized Thermodynamic Coupling  
between Hydrogen Bonding and Microenvironment Polarity  
Substantially Stabilizes Proteins”

Jianmin Gao, Daryl A. Bosco, Evan T. Powers\*, and Jeffery W. Kelly\*

Departments of Chemistry and Molecular and Experimental Medicine and The  
Skaggs Institute for Chemical Biology, The Scripps Research Institute, 10550 North  
Torrey Pines Road, BCC265, La Jolla, CA 92037, USA

\*To whom correspondence should be addressed. E-mail: [jkelly@scripps.edu](mailto:jkelly@scripps.edu),  
[epowers@scripps.edu](mailto:epowers@scripps.edu)

**Supplementary Figure 1. Circular dichroism spectra of loop-1–modified Pin WW domain variants.** The characteristic maxima were observed for all variants, indicating that they adopt a native WW domain fold.

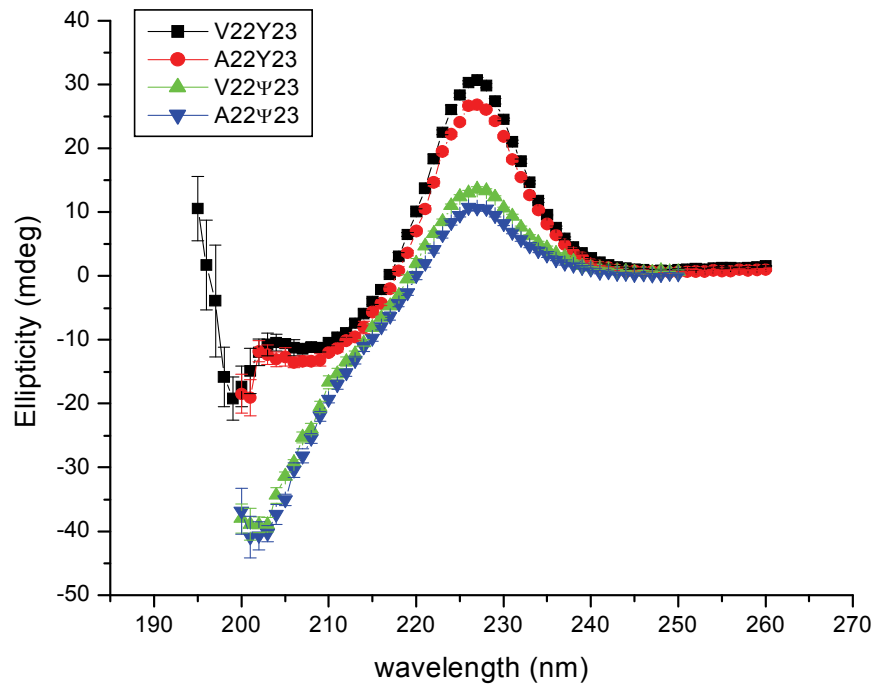



**Supplementary Figure 3.**  $^1\text{H}$ - $^1\text{H}$  NOESY spectra of protein A\* variants G30F (black) and G30F/F31 $\phi$  (red). (a) NH-H $\alpha$  region. (b) NH-NH region. The fact that G30F and G30F/F31 $\phi$  exhibit analogous patterns in the fingerprint regions of their 2D NOESY spectra suggests that the ester mutant G30F/F31 $\phi$  adopts the same structure as the all amide variant G30F. The axes in both (a) and (b) are  $^1\text{H}$  chemical shifts in p.p.m.

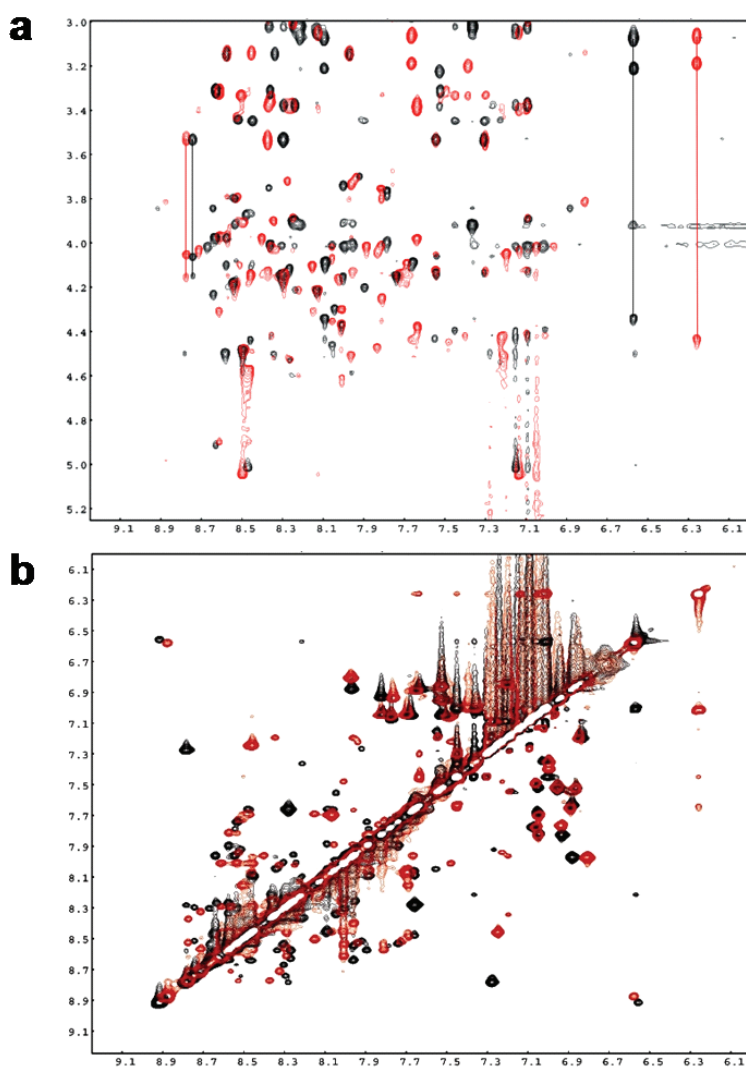

**Supplementary Figure 4.  $^1\text{H}$ - $^1\text{H}$  NOESY data for protein A\* variant G30F/F31 $\phi$ .** (a) Native protein A structure exhibiting the signature contact between Phe31 and Ala49 side chains. (b) Combining NOESY and TOCSY allows NOESY cross peak assignment. Cross peaks between aromatic protons of Phe31 and  $\beta$ -protons of Ala49 indicates that this interaction, which is characteristic of the native state, is present in the G30F/F31 $\phi$  variant of protein A\*. The axes in (b) are  $^1\text{H}$  chemical shifts in p.p.m.

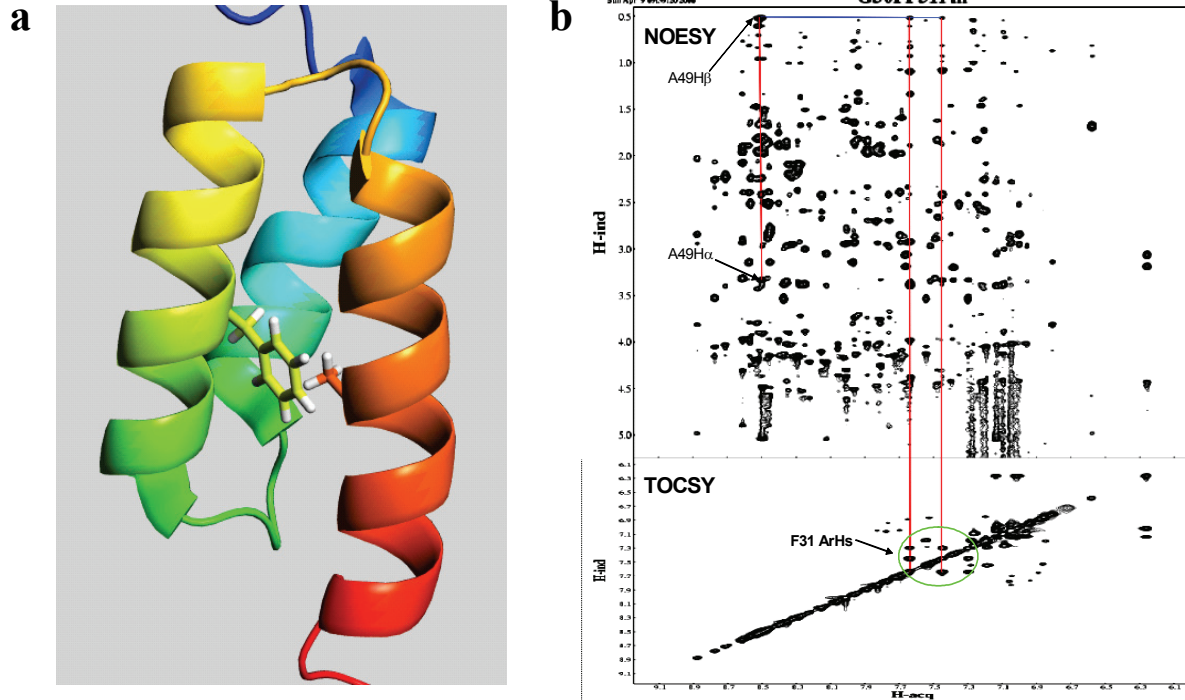

**Supplementary Figure 5. Denaturation analysis of protein A\* variants.** (a) Guanidine hydrochloride denaturation curves of protein A\* variants showing two-state cooperative transitions. (b) Thermodynamic data were extracted from fitting the denaturation curves according to a two-state model and are summarized in Table S1.

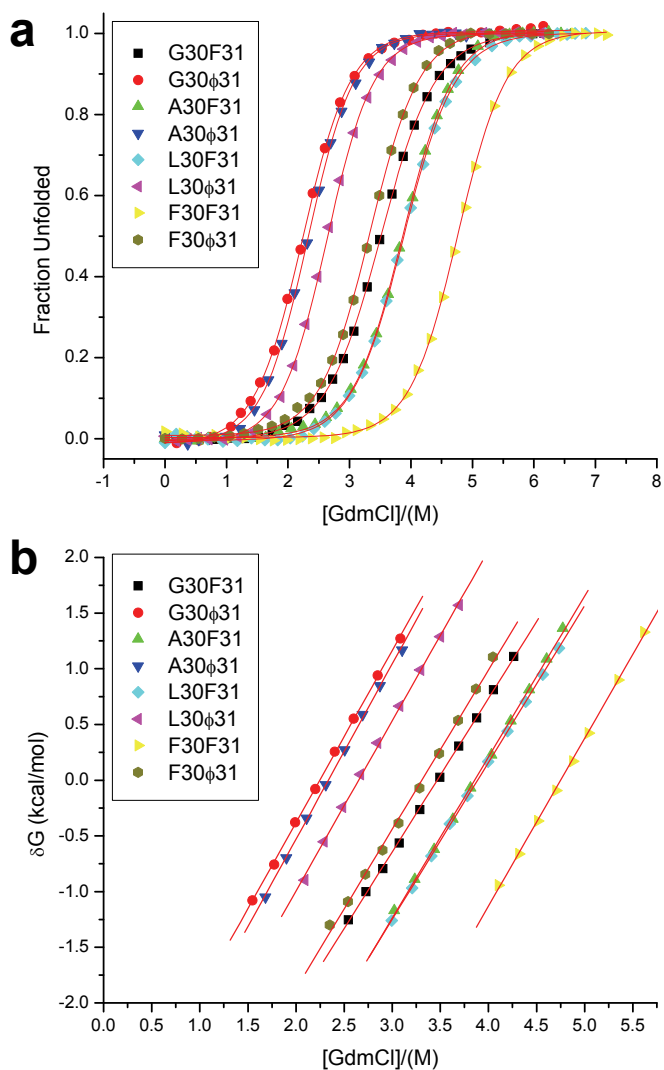

**Supplementary Table 1. Summary of thermodynamic data for the protein variants used in this study.**  $C_m$  is the denaturant concentration at which the protein in question is 50% unfolded and the  $m$  value is the slope of a plot of  $\Delta G_f$  vs. the concentration of denaturant.

| Protein                          | variants         | $C_m$ (M) | $m$ values<br>(kcal mol <sup>-1</sup><br>M <sup>-1</sup> ) | $-\Delta G_f$ (kcal<br>mol <sup>-1</sup> ) |
|----------------------------------|------------------|-----------|------------------------------------------------------------|--------------------------------------------|
| Protein A*                       | Wild-type (A1)   | 3.51±0.01 | 1.38±0.01                                                  | 4.78±0.03                                  |
|                                  | F31φ (E1)        | 2.24±0.01 | 1.54±0.02                                                  | 3.47±0.03                                  |
|                                  | G30A (A2-A)      | 3.87±0.01 | 1.44±0.02                                                  | 5.58±0.05                                  |
|                                  | G30A/F31φ (E2-A) | 2.32±0.01 | 1.57±0.02                                                  | 3.67±0.04                                  |
|                                  | G30L (A2-L)      | 3.88±0.01 | 1.41±0.01                                                  | 5.47±0.02                                  |
|                                  | G30L/F31φ (E2-L) | 2.44±0.01 | 1.53±0.02                                                  | 3.77±0.06                                  |
|                                  | G30F (A2-F)      | 4.76±0.01 | 1.49±0.02                                                  | 7.15±0.06                                  |
|                                  | G30F/F31φ (E2-F) | 3.33±0.01 | 1.43±0.03                                                  | 4.73±0.07                                  |
| Loop-1–modified Pin<br>WW domain | V22A (A1)        | 4.64±0.02 | 0.99±0.01                                                  | 4.58±0.01                                  |
|                                  | V22A/Y23ψ (E1)   | 1.47±0.02 | 1.04±0.02                                                  | 1.52±0.02                                  |
|                                  | Wild-type (A2)   | 5.85±0.02 | 0.99±0.02                                                  | 5.65±0.11                                  |
|                                  | Y23ψ (E2)        | 1.52±0.03 | 0.92±0.03                                                  | 1.42±0.05                                  |
| Pin WW domain                    | Wild-type (A1)   |           |                                                            | 3.32±0.1 <sup>†</sup>                      |
|                                  | W11ω (E1)        |           |                                                            | 2.20±0.05 <sup>†</sup>                     |
|                                  | G30DF (A2)       | 3.34±0.02 | 1.04±0.02                                                  | 3.47±0.04                                  |
|                                  | G30DF/W11ω (E2)  | 2.11±0.02 | 1.12±0.01                                                  | 2.34±0.04                                  |

<sup>†</sup> From Deechongkit et al. *J. Am. Chem. Soc.* **126**, 16762-16771 (2004).

**Supplementary Table 2. Summary of perturbation energies and backbone solvent accessible surface areas from amide-to-ester mutants in the literature.** Only mutants in which the perturbed amide donates, but does not accept, a hydrogen bond are included (type 3 mutants according to the nomenclature of Powers *et al.*<sup>1</sup>).

| Protein                                                    | Mutation         | Backbone exposed surface area ( $\text{\AA}^2$ ) <sup>a</sup> | Fractional backbone exposure | $\Delta G_{f,wt} - \Delta G_{f,mut}$ |
|------------------------------------------------------------|------------------|---------------------------------------------------------------|------------------------------|--------------------------------------|
| Pin WW domain <sup>2,3</sup><br>(pdb ID: 2KCF)             | W11 $\omega$     | 22.4                                                          | 0.53 (exposed)               | -1.1                                 |
|                                                            | E12 $\epsilon$   | 5.0                                                           | 0.11 (buried)                | -1.5                                 |
|                                                            | R14 $\rho$       | 5.4                                                           | 0.12 (buried)                | -3.9                                 |
|                                                            | S16 $\sigma$     | 16.6                                                          | 0.40 (exposed)               | -1.1                                 |
|                                                            | S19 $\sigma$     | 32.5                                                          | 0.77 (exposed)               | -0.6                                 |
|                                                            | Y23 $\psi$       | 0.4                                                           | 0.01 (buried)                | -2.2                                 |
|                                                            | N30 $\nu$        | 17.7                                                          | 0.39 (exposed)               | -1.8                                 |
|                                                            | A31 $\alpha$     | 13.1                                                          | 0.28 (exposed)               | -0.8                                 |
|                                                            | Q33 $\theta$     | 4.9                                                           | 0.11 (buried)                | -3.1                                 |
| T4 lysozyme (pdb ID: 2LZM) <sup>4</sup>                    | (I)L50 $\lambda$ | 28.4                                                          | 0.68 (exposed)               | -0.7                                 |
| Eglin C (pdb ID: 1EGL) <sup>5</sup>                        | G70 $\gamma$     | 20.7                                                          | 0.24 (exposed)               | -0.4                                 |
| P22 Arc repressor (pdb ID: 1MYK) <sup>6</sup>              | L8 $\lambda$     | 5.8                                                           | 0.14 (buried)                | -1.2                                 |
| V9F mutant of villin headpiece (pdb ID: 1YRF) <sup>7</sup> | F10 $\phi$       | 10.2                                                          | 0.24 (exposed)               | -1.5                                 |
| Protein L (pdb ID: 1HZ6) <sup>8</sup>                      | F106 $\phi$      | 1.8                                                           | 0.04 (buried)                | -0.55                                |
| Average, buried sites                                      | n/a              | n/a                                                           | $\leq 0.2$                   | $-2.1 \pm 0.5$                       |
| Average, exposed sites                                     | n/a              | n/a                                                           | $> 0.2$                      | $-1.0 \pm 0.2$                       |

<sup>a</sup>Exposed surface areas were calculated using the program GETAREA<sup>9</sup>.



## Supplementary References

1. Powers, E.T., Deechongkit, S. & Kelly, J.W. Backbone-backbone H-bonds make context-dependent contributions to protein folding kinetics and thermodynamics: Lessons from amide-to-ester mutations. *Adv. Protein Chem.* **72**, 39-78 (2006).
2. Deechongkit, S., Dawson, P.E. & Kelly, J.W. Toward assessing the position-dependent contributions of backbone hydrogen bonding to beta-sheet folding thermodynamics employing amide-to-ester perturbations. *J. Am. Chem. Soc.* **126**, 16762-16771 (2004).
3. Deechongkit, S. et al. Context-dependent contributions of backbone hydrogen bonding to beta-sheet folding energetics. *Nature* **430**, 101-105 (2004).
4. Koh, J.T., Cornish, V.W. & Schultz, P.G. An experimental approach to evaluating the role of backbone interactions in proteins using unnatural amino acid mutagenesis. *Biochemistry* **36**, 11314-11322 (1997).
5. Lu, W.Y. et al. Deciphering the role of the electrostatic interactions involving Gly70 in eglin C by total chemical protein synthesis. *Biochemistry* **39**, 3575-3584 (2000).
6. Wales, T.E. & Fitzgerald, M.C. The energetic contribution of backbone--backbone hydrogen bonds to the thermodynamic stability of a hyperstable P22 Arc repressor mutant. *J Am Chem Soc* **123**, 7709-7710 (2001).
7. Gao, J.M. & Kelly, J.W. Toward quantification of protein backbone-backbone hydrogen bonding energies: An energetic analysis of an amide-to-ester mutation in an alpha-helix within a protein. *Protein Sci.* **17**, 1096-1101 (2008).
8. Yang, X., Wang, M. & Fitzgerald, M.C. Direct analysis of backbone-backbone hydrogen bond formation in protein folding transition states. *J Mol Biol* **363**, 506-519 (2006).
9. Fraczkiewicz, R. & Braun, W. Exact and efficient analytical calculation of the accessible surface areas and their gradients for macromolecules. *J. Comput. Chem.* **19**, 319-333 (1998).
